# Supplementary material for: Freely drawn single lipid nanotube patterns
Source: Royal Society of Chemistry journal article supplement (doi:10.1039/c5sm00043b), 2015-01-01
Supplement: c5sm00043b7.pdf [file c5sm00043b7.pdf]

## Supporting Information

### Freely drawn single lipid nanotube patterns

*Kaori Sugihara,\* Amin Rustom and Joachim P. Spatz*

Max Planck Institute for Intelligent Systems, Dept. New Materials and Biosystems &  
University of Heidelberg, Institute for Physical Chemistry, Dept. Biophysical Chemistry;  
postal address: Heisenbergstr. 3, D-70569 Stuttgart, Germany

\* corresponding author: kaori.sugihara@unige.ch

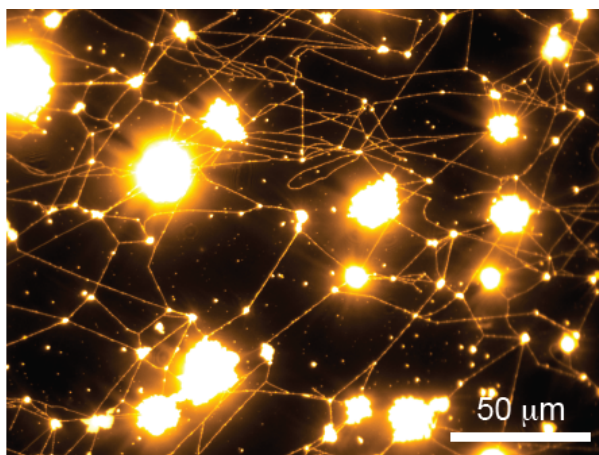

**Figure S1:** Lipid nanotubes assembled on PEI

Figure S1 shows a typical fluorescent image of LNTs assembled on PEI surfaces (mother LNTs). All the LNTs in SI consist of DOPE and 0.5 % Liss Rhodamine-PE as the ones described in the main text.

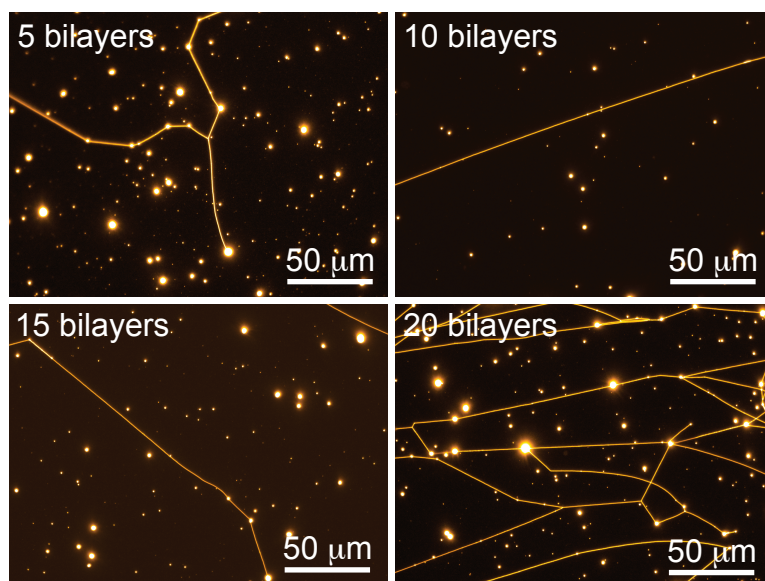

**Figure S2:** LNT assembly on  $(\text{PEI/PSS})_n\text{PEI}$ .

Figure S2 shows fluorescent images of LNTs formed on  $(\text{PEI/PSS})_n\text{PEI}$  (bilayer number  $n = 5, 10, 15, 20$ ). Note that the difference in the density of the LNTs is due to the random flow induced by a pipette.

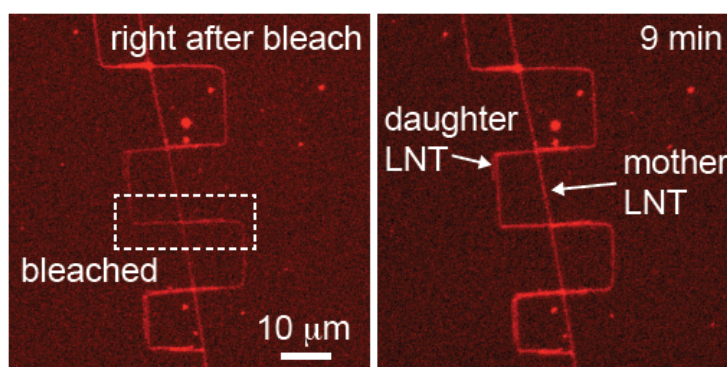

**Figure S3:** Fluorescence recovery after photo bleaching (FRAP) of daughter LNTs.

Figure S3 shows fluorescence recovery after photobleaching of a created LNT object. The recovery suggests the fluidity of the daughter LNTs and the continuous connection to the mother LNT.

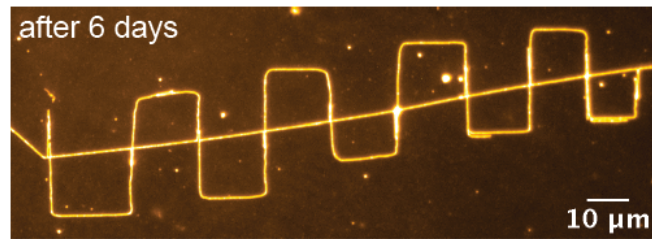

**Figure S4:** Lifetime of the created LNT objects

Figure S4 shows a fluorescent image of a single LNT object 6 days after it was drawn (the same sample as Figure 5B in the main text).
